# Supplementary material for: Scopolin Prevents Adipocyte Differentiation in 3T3-L1 Preadipocytes and Weight Gain in an Ovariectomy-Induced Obese Mouse Model
Source: MDPI journal article supplement (doi:10.3390/ijms21228699), 2020-11-18
Supplement: s1 [file s1]

# **Scopolin attenuates adipocyte differentiation in 3T3-L1 preadipocytes and weight gain in ovariectomy-induced obesity mice.**

**Eunkuk Park, Chang Gun Lee, Jeonghyun Kim, Eunkug Lim and Subin Yeo & Seon-Yong Jeong**

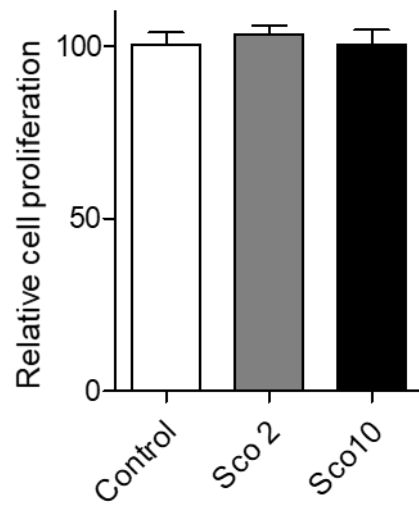

**Supplementary figure S1.** Effect of scopolin on cell viability in 3T3-L1 cells. The cells were cultured with two different concentrations of Scopolin (2 and 10  $\mu$ M), and the cell viability were analyzed. .

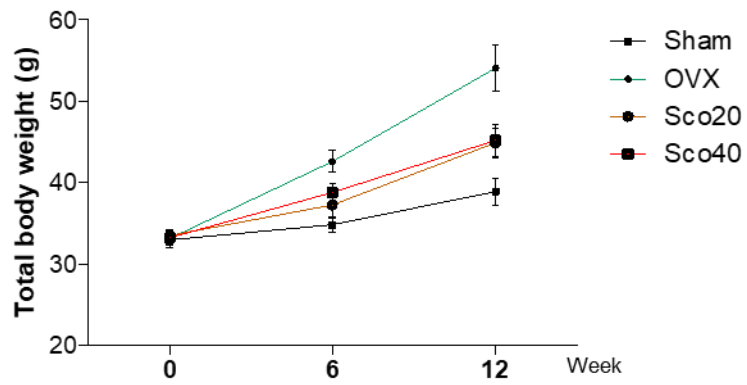

**Supplementary figure S2.** Changes of total body weight at 0, 6, and 12 weeks

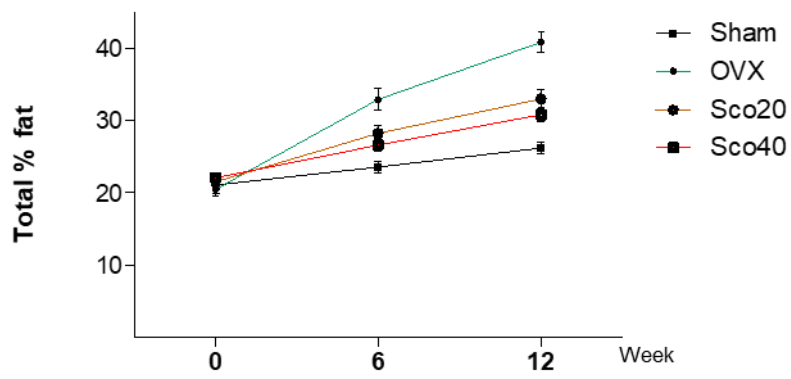

Supplementary figure S3. Changes of total % fat at 0, 6, and 12 weeks.
